# Supplementary material
Source: publisher figshare collection journal article supplement (https://sage.figshare.com/ndownloader/files/15111677)
Supplement: Supplementary file 1 [file 15111677]

## Appendix F:

### Transcripts

#### 1. Opening the video-based session: the coach's presentation

313 Pnina Thanks to Orit who was the first Nachshon ben  
314 Aminadav<sup>1</sup> to jump into the water  
315 and before we turn to view the video we'll look  
316 we've photocopied (*distributes transcript*),  
317 I don't know if there's enough for everyone  
318 please open please on page 2  
319 when we go to watch a video, particularly as  
320 educators  
321 we tend to very quickly judge what was wrong as  
322 teachers  
323 And for us to really benefit  
324 we want to learn how to view a video  
325 this is something we need to learn  
326 how do we view a video and what's the added value  
327 uh everybody got a copy? Good  
328 And what's the added value we learn from viewing  
329 this video  
330 so we want to look  
331 we have an opening that  
332 in our opening, we'll say it briefly  
333 we have the ethical code, the ethical code  
334 we talked about it last time when Efrat was here  
335 when we view a video what's required of us  
336 so we don't talk about that teacher  
337 and everything we're saying here we say  
338 professionally  
339 we don't sit afterwards in the teacher lounge and  
340 speak about this lesson  
341 meaning we have an ethical code that last time  
342 when Efrat was here we talked about  
343 how this is supposed to happen  
344 and what's required of us as teachers  
345 That's one thing  
346 We're not here to skewer anyone  
347 and that's not the goal  
348 but our goal is to extract some kind of insight  
349 and from here to continue  
350 so this is the first thing  
351 It's very important for us that Orit will open  
352 we see only a small section of what took place in  
353 the lesson  
354 so don't forget that  
355 there's a context here that we won't see  
356 So Orit will soon give as an introduction about  
357 what happened  
358 and then we'll watch  
359

---

<sup>1</sup> Nachshon, the son of Aminadav, is a figure in the Hebrew Bible, a leader of the tribe of Judah. When everyone else hesitated, he jumped into the Red Sea.

360 after our viewing each will have to write what  
361 she sees  
362 not what she hears or what she thinks  
363 what her eyes see  
364 practically seeing only  
365 no judgment, no thinking about what she meant,  
366 not from that angle  
367 what do you see, that's the first assignment  
368 you'll have to do  
369 Then well move to the next assignment  
370 But before we begin we want to  
371 please, we want to hear the opening

## 2. Presenting the lesson: Taking a line.

372 Orit We were working on a story called "The Sabbath Pie"  
373 which is a piece that we teach from "In the Language  
374 of Lines" [a Hebrew literature reader] in sixth  
375 grade  
376 which worked for me in terms of the timing  
377 both because this past Jewish month we learned more  
378 about the topic of the Sabbath  
379 and also on the first of Kislev [Hebrew month during  
380 which Hannukah falls]  
381 we taught, uh I taught this unit at the beginning of  
382 Kislev  
383 that this text very much presents  
384 what is Jewish heroism  
385 so it was easy for me to make the connection between  
386 the two  
387 Uh, my goal in language lessons is to use lots and  
388 lots of spoken language  
389 meaning to have discussions  
390 and when I taught this, I also said to Pnina  
391 when I see that the class is cooperating and really  
392 enriching one another's knowledge, I extend this  
393 portion of the lesson  
394 I don't run to stop and move on to differentiated  
395 work  
396 And I, and this lesson, it was really an example of  
397 a lesson in which it flowed really nicely  
398 in terms of the class discussion  
399 and I preferred not to stop  
400 And also the page they were supposed to fill out in  
401 group  
402 which was the flow chart of the text  
403 we did it together in the whole group  
404 because I saw at that moment  
405 I saw that it was much more appropriate  
406 Uh, the video doesn't reflect the entire lesson  
407 like, how we opened, how we closed, how we analyzed  
408 the title

409           really according to the rules that we're like trying  
410           to strictly follow  
411           I hope that (.) you'll be able to see something  
412           ((laughing))

### 3. Discussing student behavior: Other teachers' face-work.

619 Tamar       Uh I see an energetic teacher  
620           that the kids are listening to her and  
621           cooperating  
622           but I'm not kidding  
623           it was truly difficult for me to concentrate  
624           that kid really distracted me ((laughing))  
625           I don't know if it's just, uh, me  
626 Pnina       You saw one kid who?  
627 Tamar       Yeah, I don't know  
628           to me he, to me he  
629 Dan         Actually the class  
630           it made an impression that  
631 Tamar       No, they listened and cooperated  
632           for me personally it was a little difficult to  
633           focus during the lesson  
634           a little uh  
635 Dan         The class isn't distracted by him  
636           and it's appropriate work on her part  
637           that she doesn't give him the space  
638           [by saying] "sit," "why are you doing [that],"  
639           etcetera  
640 Over-       Apparently they've gotten used to it and ignore  
641 lapping     it  
642 Tamar       Yes, Orit also continued running the lesson  
643 Dan         It could flow to the wrong place  
644 Pnina       Thank you  
645 Dan         And then he calms down at some point  
646 Pnina       Yes?  
647 Gila        Okay, I saw the teacher leading the students to  
648           the answers that she wants to receive  
649           using encouragement and reinforcing words  
650           "excellent," "great,"  
651           individual attention to each student  
652           relating to the different child  
653           occasionally she approaches him, touches him  
654           it's very very important  
655           This is a child with needs  
656           I don't know exactly what his situation in  
657           class is  
658           but the teacher pays attention to him and  
659           despite this, she runs the lesson  
660           listen, you uh  
661 Pnina       We're not giving grades  
662 Gila        There's nothing to say  
663 Pnina       Okay

#### 4. Discussing dictation: Orit's face-work.

906 Pnina What was the issue and why did you want to focus  
907 on this particular segment [of video]?  
908 Orit Ok so really because this segment is really uh  
909 active learning  
910 there was this stage of  
911 more of having them copy more XXX  
912 First it was, they said, I wrote  
913 It was less important to me to show how I  
914 organize the white board  
915 and how I write all the details for them on the  
916 whiteboard  
917 It was more important for me to show really the  
918 their knowledge  
919 the classroom talk  
920 I even told Pnina this morning that I really  
921 took upon myself the topic of encouraging  
922 classroom talk this year  
923 And I'm - I'm a person who likes to talk  
924 it's not a problem for me  
925 but like with the class it's something that we  
926 work on a lot  
927 It was also important for me to show the topic  
928 of uh uh let all the students be heard  
929 It's very very important in my opinion after  
930 that to dictate to them  
931 like so they'll have some kind of uniform answer  
932 because what happens is that when each one  
933 writes what he thinks  
934 there isn't always  
935 I don't always manage as a teacher to go over  
936 all the pages  
937 so things aren't always correct  
938 sometimes a kid understands, a kid gives an  
939 interpretation  
940 meaning you can give space to all the students  
941 in the class  
942 to give answers orally  
943 but afterwards [you need] to put them into some  
944 kind of framework  
945 Noya But where -  
946 ? Meaning that you always do that?  
947 Noya free expression or  
948 ? I wanted to ask that too  
949 ? Or written expression that each kid  
950 Orit I give them space, for each to write, in the  
951 differentiated group assignments  
952 for each  
953 but I also know I'm obliged to check  
954 and they know  
955 once a week I take a bunch of folders to check  
956 each time I take writing assignments of some  
957 kids because I can't leave it with 'ok, write

958           what you think' and not check if they worked  
959           according to the right structure  
960           and presented arguments  
961           and convinced or didn't convince

...

989   Pnina    Meaning, the issue, if I understand from what  
990            you explained, that arises, is is wondering if  
991            part of the lesson is dictating to them  
992            if it's appropriate to operate this way?  
993   Orit     Depends on what, depends on what  
994   Pnina    Meaning it's something we can discuss?  
995   Orit     That when I want  
996   Zehava   She exercised judgement here  
997   Orit     When I want them to know how to use  
998   Pnina    Are we asking if this was the issue?  
999   Orit     Yes, when I want them to know how to use a  
1000           concept correctly

## **5. Discussing group work: Managing face while confronting the principal.**

1162   Efrat   For me it's very difficult  
1163            the class, it wasn't really open in front of us  
1164            it was just one group, that in all  
1165            in my opinion, they really were very much with  
1166            Orit, this group  
1167            But along with this I say that there's no doubt  
1168            listen, studies have also shown, that the  
1169            proportion of concentration  
1170            or the amount of time that children can  
1171            concentrate in a frontal lesson  
1172            is seven to ten minutes maximum  
1173            not more than that, you understand?  
1174            So here it's entirely possible that the kids  
1175            made great efforts  
1176            because they knew that there's a camera, of  
1177            course, and so on  
1178            meaning it was something kind of, you know,  
1179            staged, yes?

...

1284   Efrat   We, it's very easy for us, again I'm saying  
1285            it's very easy for us to be, again I'm saying to  
1286            be the leading actor  
1287            very easy  
1288            of course it's very easy, there's no doubt about  
1289            it.  
1290            But again, we, in order to really reach them

1291 no, it's easy for us  
 1292 Noya But it -  
 1293 Efrat From that perspective  
 1294 Noya She wasn't the leading actress here  
 1295 because there was a really big discussion with  
 1296 the kids  
 1297 Efrat Again, she was the leading actress and I'll  
 1298 tell you why.  
 1299 She was the leading actress but that doesn't mean  
 1300 that she didn't let others talk  
 1301 in being the leading actress, she really did let  
 1302 them talk  
 1303 it really doesn't mean  
 1304 Noya Exactly, because there was a discussion that was  
 1305 very -  
 1306 Efrat No, she was the leading actress, in that she  
 1307 stood and everyone was looking at her and only  
 1308 at her were they looking  
 1309 she was pretty and nice and modest  
 1310 but only at her ((background laughter)) did  
 1311 they look the entire time  
 1312 that's the leading actor.  
 1313 I mean, for example, the minute there was group  
 1314 work, when they had to study with peers  
 1315 that's something else  
 1316 that's already a different lesson design  
 1317 Noya So you're saying it depends on the dosage  
 1318 Orit it's much easier for me to work with them in  
 1319 groups than to stand and be the lead actor  
 1320 Efrat Depends on what  
 1321 Orit The groups it's  
 1322 Efrat Depends on what  
 1323 Orit you walk among the groups  
 1324 instruct 5 to 6 students  
 1325 Efrat It's not exactly so because here you have the  
 1326 problem of controlling the class that you don't  
 1327 have when you're playing the leading actress  
 1328 Issues of behavior, issues of  
 1329 Here you enter, listen  
 1330 when it's group work you need to invest energy  
 1331 in other things  
 1332 there's no doubt about it, yes?  
 1333 that's why I'm saying  
 1334 in a class with habits it's less of a problem  
 1335 a class with no habits it's more of a problem  
 1336 Orit so possibly because today I'm already in group  
 1337 learning for the second year  
 1338 I feel entirely in a different place, I mean -  
 1339 Efrat maybe  
 1340 Orit I don't feel I -  
 1341 Efrat maybe  
 1342 Orit waste energy when we work in groups.  
 1343 You [singular, addressing Efrat] can come in  
 1344 and see  
 1345 Efrat good  
 1346 Orit It's a process of course

1347 Efrat right  
1348 Orit we went through hell until we reached this  
point
